# Supplementary material for: On the distribution of hydrophilic polyelectrolytes and their counterions around zwitterionic micelles: the possible impact on the charge density in solution
Source: Royal Society of Chemistry journal article supplement (doi:10.1039/d0sm01541e), 2020-11-06
Supplement: d0sm01541e1.pdf [file d0sm01541e1.pdf]

# **On the Distribution of Hydrophilic Polyelectrolytes and their Counterions around Zwitterionic Micelles: the Possible Impact on the Charge Density in Solution**

Massimo Mella<sup>†\*</sup>, Andrea Tagliabue<sup>†</sup>, and Lorella Izzo<sup>‡</sup>

<sup>†</sup>Dipartimento di Scienza ed Alta Tecnologia, Università degli Studi dell'Insubria, via Valleggio 9, 22100 Como (I),

<sup>‡</sup>Dipartimento di Biotecnologie e Scienze della Vita, Università degli Studi dell'Insubria, via J. H. Dunant 3, 21100 Varese (I)

*Dated: November 13, 2020*

Compared to the  $\mathcal{L}(1, 60)$  cases, for  $\mathcal{LS}(1, 60)$  systems the monomers distributions (top panel in Figure 1) display a lower peak and a marked shoulder due to the star-like structure that keeps the majority of the monomers distant from the micellar corona. A shorter tail is also displayed by  $\mathcal{S}(6, 10, \text{SBS})$ . The average properties shown suggest a lower propensity for the star-like species to be adsorbed onto the micelles, together with a lower value for the osmotic coefficient that is typical of this denser species<sup>1</sup>.

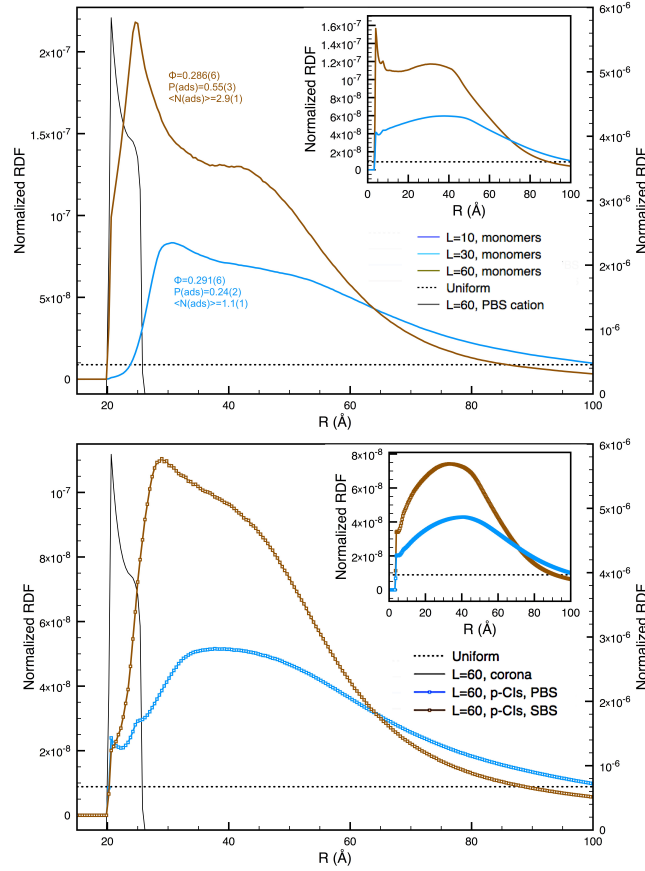

Figure S1: Radial and pair distribution functions for  $\mathcal{S}(6, 10, \text{SBS})$  and  $\mathcal{S}(6, 10, \text{PBS})$ . The dashed line represent the distributions for uniformly distributed species; the right axis related to the zwitterion anion distributions. Top: distributions from the micelle centre for the charged monomers, together with the results for the osmotic coefficient  $\Phi$ , the probability of polyelectrolyte adsorption, and the average number of adsorbed monomers; the distributions for the monomer/cationic moiety pairs are also shown in the inset. For the isolated  $\mathcal{S}(6, 10)$ ,  $\Phi = 0.32(2)$ . Bottom: distributions from the micelle centre for the p-CIs; the distributions for the p-CIs/ $A_{\text{SBS}}$  pairs are also shown in the inset.

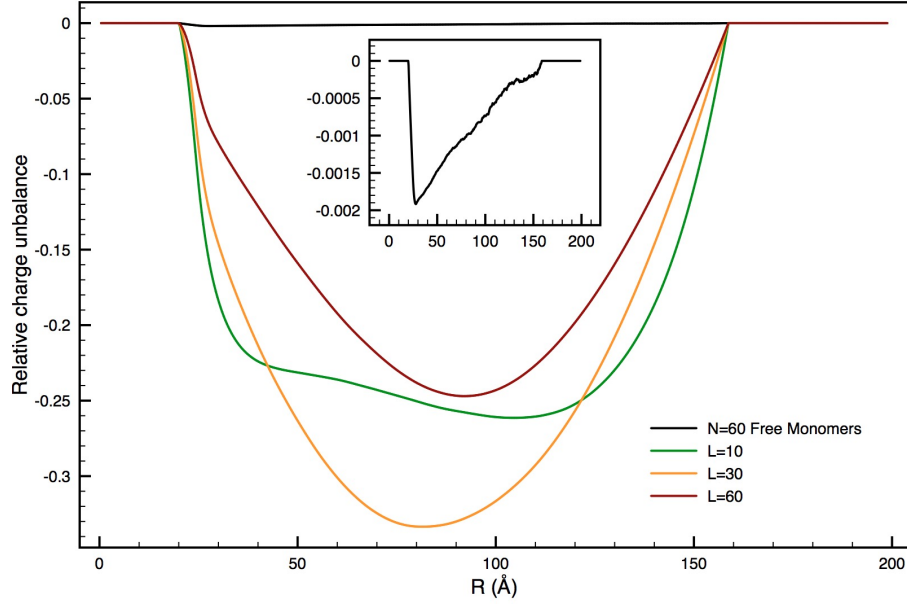

Figure S2: Relative charge unbalance within a distance  $R$  from the micelle center,  $(4\pi \int_0^R [\rho_+(r) - \rho_-(r)] r^2 dr) / N_{\text{mono}}$ , for the  $\mathcal{L}(1, L, \text{SBS})$  and free monomers cases discussed in the main text. Here,  $\rho(r)$ 's are the local concentrations of polyanion monomers and p-CIs. Notice the two orders of magnitude difference in this quantity for the polymeric and simple ion (also in the inset) systems. The presence of a substantially non-compensated negative charge in the vicinity of the micelle when the polyanions visit the corona region is made clearly evident by the behaviour at short  $R$  values.

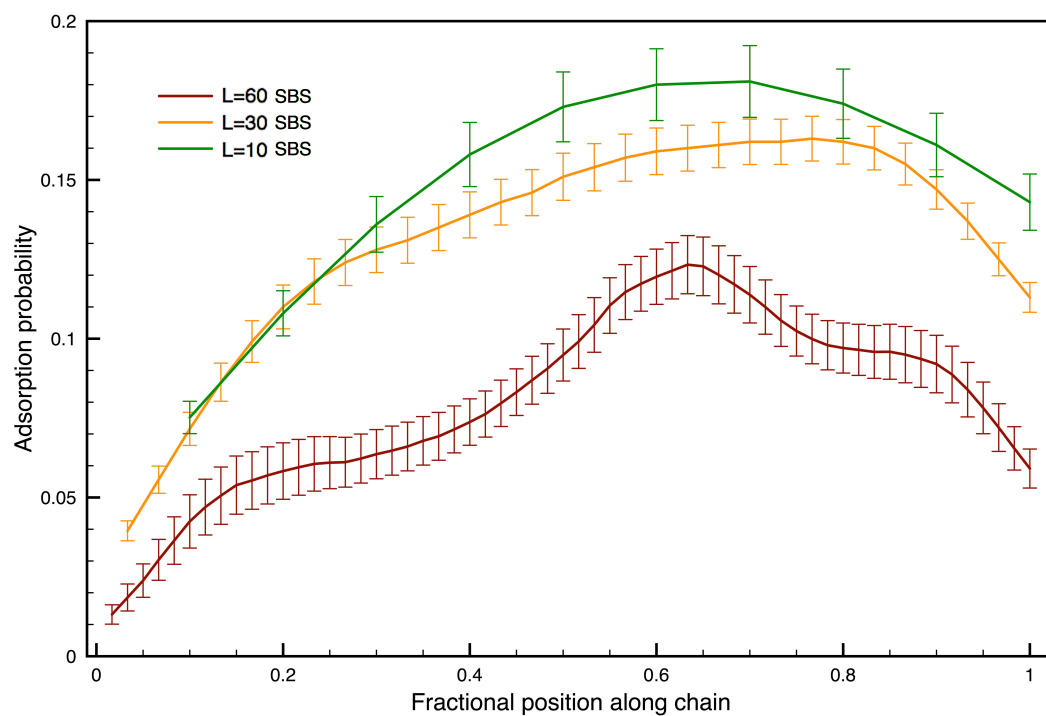

Figure S3: Adsorption probability on SBS micelles for anionic monomers versus their fractional position along linear chains with  $L = 10, 30$ , and  $60$ .



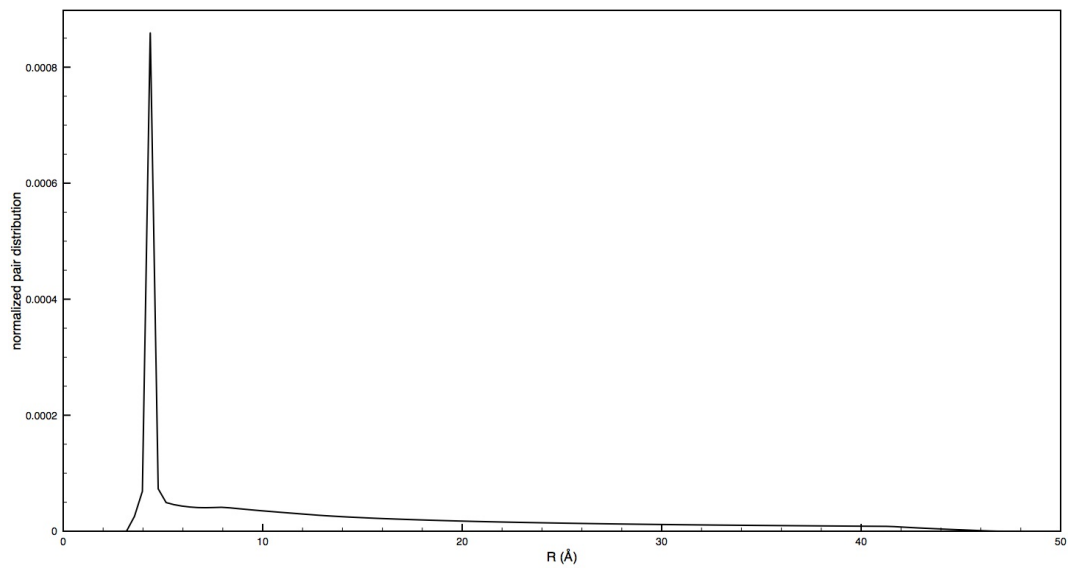

Figure S4: Normalized pair distribution function for the  $A_{\text{SBS}}/C_{\text{SBS}}$  couple when external electrolytes were absent. Notice the intense peak at short  $R$  values representative of the pair interaction strength, which remains unchanged even after adding 60 monomer/p-CI pairs.

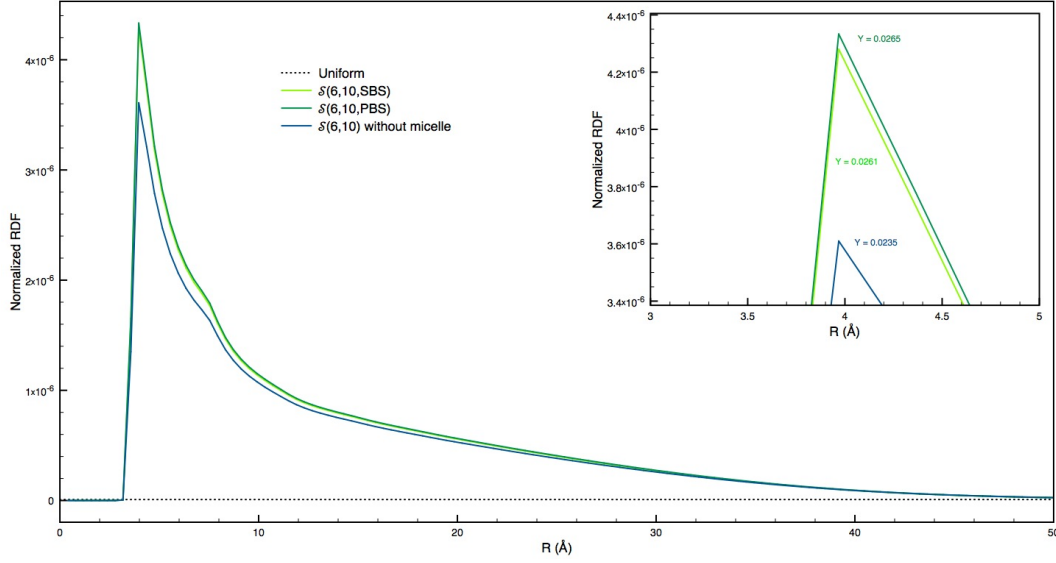

Figure S5: Normalized distributions for the monomers/p-CIs pairs ( $\lambda(r)$ ) obtained simulating  $\mathcal{S}(6, 10, \text{SBS})$  and  $\mathcal{S}(6, 10, \text{PBS})$  systems and the isolated polyelectrolytes  $\mathcal{S}(6, 10)$  (noM). The inset shows a magnified view of the peak region; the “condensation index”  $\gamma$  for each case is also provided in the vicinity of the appropriate distributions with matching colors.

In agreement with the results in Figure 1, the condensation index  $\gamma$  appears higher than the one for  $\mathcal{L}(1, 60)$ . Apart from this, a lower  $\Phi$  (roughly 10%) is found for the micelle/polyelectrolyte complexes than for the isolated polyelectrolytes; this agrees well with the relative  $\gamma$  values and suggests some form of synergy between micelles and polyelectrolyte in maintaining p-CIs localized on polymer arms.

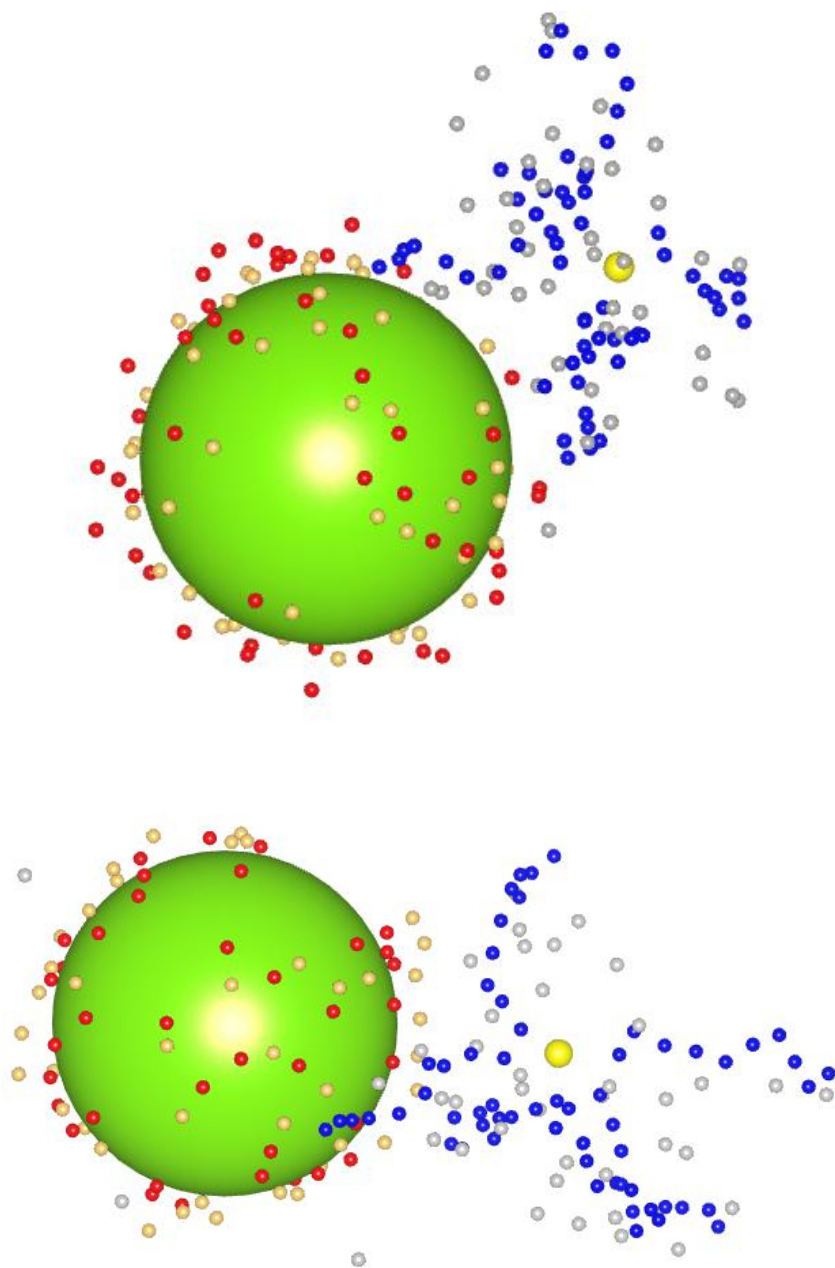

Figure S6: Adsorbed configurations sampled for the  $S(6, 10, \text{SBS})$  (top) and  $S(1, 60, \text{PBS})$  (bottom) systems. Color coding: light blue, negative monomers; silver, p-CIs; red, SBS and PBS negative moieties; light orange, SBS and PBS positive moieties; yellow, neutral nucleus. The impenetrable micellar core is depicted in green.

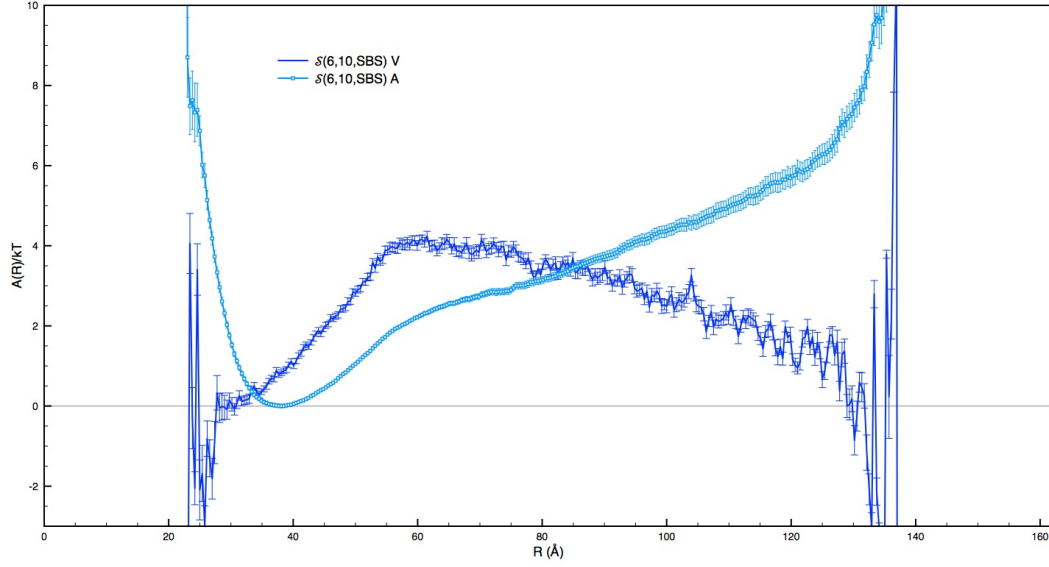

Figure S7: Helmholtz ( $A(R)$ ) and potential ( $\bar{V}(R)$ ) energy profiles along the P/M centers of mass distance for  $\mathcal{S}(6, 10, \text{SBS})$  system.

## References

1. M. Mella, A. Tagliabue, L. Mollica, and L. Izzo, J. Colloid Interf. Sci. **560**, 667 (2020), ISSN 0021-9797, URL <http://www.sciencedirect.com/science/article/pii/S0021979719312317>.
